# Supplementary material for: Analysis of volatile arsenic compounds formed by intestinal microorganisms: rapid identification of new metabolic products by use of simultaneous EI-MS and ICP-MS detection after gas chromatographic separation
Source: Royal Society of Chemistry journal article supplement (doi:10.1039/b822968f), 2009-01-01
Supplement: b822968f.pdf [file b822968f.pdf]

## Electronic Supplement

Table S 1: ICP-MS acquisition parameters used in this work.  $^{71}\text{Ga}$  was used as internal standard for the low ( $^{75}\text{As}$ ,  $^{77}\text{Se}$ ,  $^{73}\text{Ge}$ ,  $^{82}\text{Se}$ ),  $^{113}\text{In}$  for the middle ( $^{126}\text{Te}$ ,  $^{118}\text{Sn}$ ,  $^{121}\text{Sb}$ ,  $^{127}\text{I}$ ) and  $^{205}\text{Tl}$  for the high mass range ( $^{202}\text{Hg}$ ,  $^{209}\text{Bi}$ ).

|                    |                                                                                                                                                                                                                                   |
|--------------------|-----------------------------------------------------------------------------------------------------------------------------------------------------------------------------------------------------------------------------------|
| Sampling time      | 0.308 s                                                                                                                                                                                                                           |
| Analyte masses     | (0.05 s) $^{75}\text{As}$ , $^{77}\text{Se}$ ,<br>(0.02 s) $^{73}\text{Ge}$ , $^{82}\text{Se}$ , $^{126}\text{Te}$ ,<br>(0.01 s) $^{118}\text{Sn}$ , $^{121}\text{Sb}$ , $^{127}\text{I}$ , $^{202}\text{Hg}$ , $^{209}\text{Bi}$ |
| Internal standards | (0.005 s) $^{71}\text{Ga}$ , $^{113}\text{In}$ , $^{205}\text{Tl}$                                                                                                                                                                |
| Matrix components  | (0.01 s) $^{129}\text{Xe}$ , $^{13}\text{C}$ , $^{30}\text{Si}$ , $^{34}\text{S}$<br>(0.002 s) $^{35}\text{Cl}$ , $^{44}\text{CO}_2$                                                                                              |

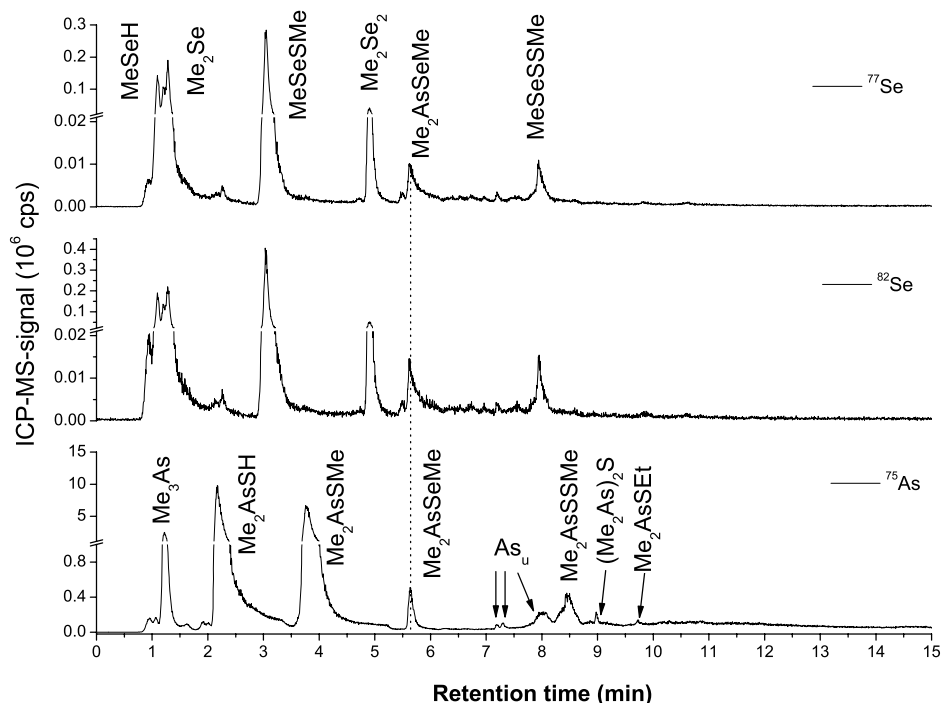

Fig. S 1: P&T-GC/EI-MS/ICP-MS chromatogram from a parallel batch as in **Error! Reference source not found.** is shown. Please note the simultaneous  $^{75}\text{As}$ -,  $^{77}\text{Se}$  and  $^{82}\text{Se}$ -signal for  $\text{Me}_2\text{AsSeMe}$ . Small differences in retention times are caused by the use of constant flow instead of constant pressure. Furthermore, purging time was 7 min instead of 12 min.  $\text{As}_u$ : unidentified As-species

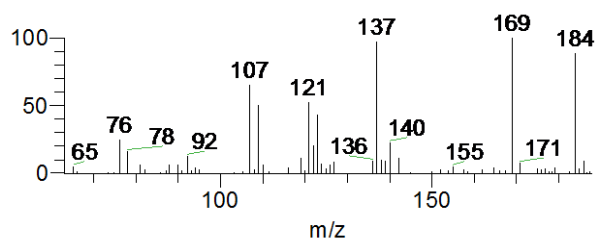

Fig. S 2: EI-MS-spectra of synthesized  $\text{MeAs}(\text{SMe})_2$

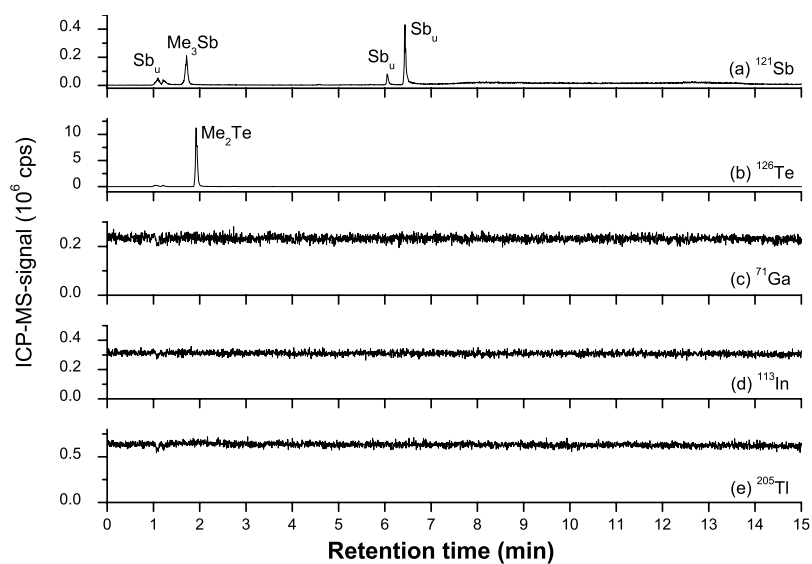

Fig. S 3: additional ICP-MS mass traces of the measurement in Fig. 1. (a&b) P&T-GC/ICP-MS chromatogram of volatile Sb resp. Te species from headspace from feces amended with inorganic metal(loid)s analysed and (c-e) ICP-MS –mass trace of the continuous internal standards used in this study showing the good plasma stability during GC-analysis. Sb<sub>u</sub> and Te<sub>u</sub>: unidentified species.
